# Supplementary material
Source: publisher site journal article supplement (https://www.degruyter.com/publication/journal_key/ROMS/downloadAsset/ROMS_ROMS_LANGUAGE%20EDITING.pdf)
Supplement: Supplementary file 1 [file ROMS_ROMS_LANGUAGE%20EDITING.pdf]

## REVIEW OF MARKETING SCIENCE (ROMS)

### LANGUAGE EDITING

All manuscripts must be written in proper English (either British or American standard, but not the mixture of both). If you have reasons to doubt your proficiency with respect to spelling, grammar, etc. (e.g., because English is not your native language), then you may wish to employ—at your expense—the services of a professional language editor.

Please get in touch with the Language Editors directly to discuss details.

- Alexandra Griswold  
[dralex321@gmail.com](mailto:dralex321@gmail.com)

Areas of expertise: public policy, political science, education, economics, social sciences, humanities, ethics

- Cyndy Brown  
[browncyndy@yahoo.com](mailto:browncyndy@yahoo.com)

Areas of expertise: political science, social sciences, humanities, ethics

- Donna Reeder  
Reeder Literary Services

Areas of expertise: political science, economics, mathematical economics, natural sciences, social sciences, technology, law, humanities, liberal arts, literary studies, health and medicine

- Dorothy Schepps  
[dschepps2@gmail.com](mailto:dschepps2@gmail.com)

Areas of expertise: political science, emergency management, homeland security, community/land use planning, law, economics, cyber terrorism, and cyber security

- Jane Cotnoir  
[jane.cotnoir@gmail.com](mailto:jane.cotnoir@gmail.com)

Areas of expertise: Local government management, international crime and terrorism, emergency/disaster management, humanities, social science

- Patience Kramer  
[patience.kramer@att.net](mailto:patience.kramer@att.net)

Areas of expertise: Health and Medicine (CAM and drug policy and analysis), Economics and Business (with a focus on marketing)

- Steve Peter  
[speter@mac.com](mailto:speter@mac.com)

Areas of expertise: LaTeX, Linguistics, economics, mathematics
